# Supplementary material for: Bioactivity Screening and Chemical Characterization of Biocompound from Endophytic Neofusicoccum parvum and Buergenerula spartinae Isolated from Mangrove Ecosystem
Source: MDPI journal article supplement (doi:10.3390/microorganisms11061599), 2023-06-16
Supplement: s1 [file s1]

Fig 1.

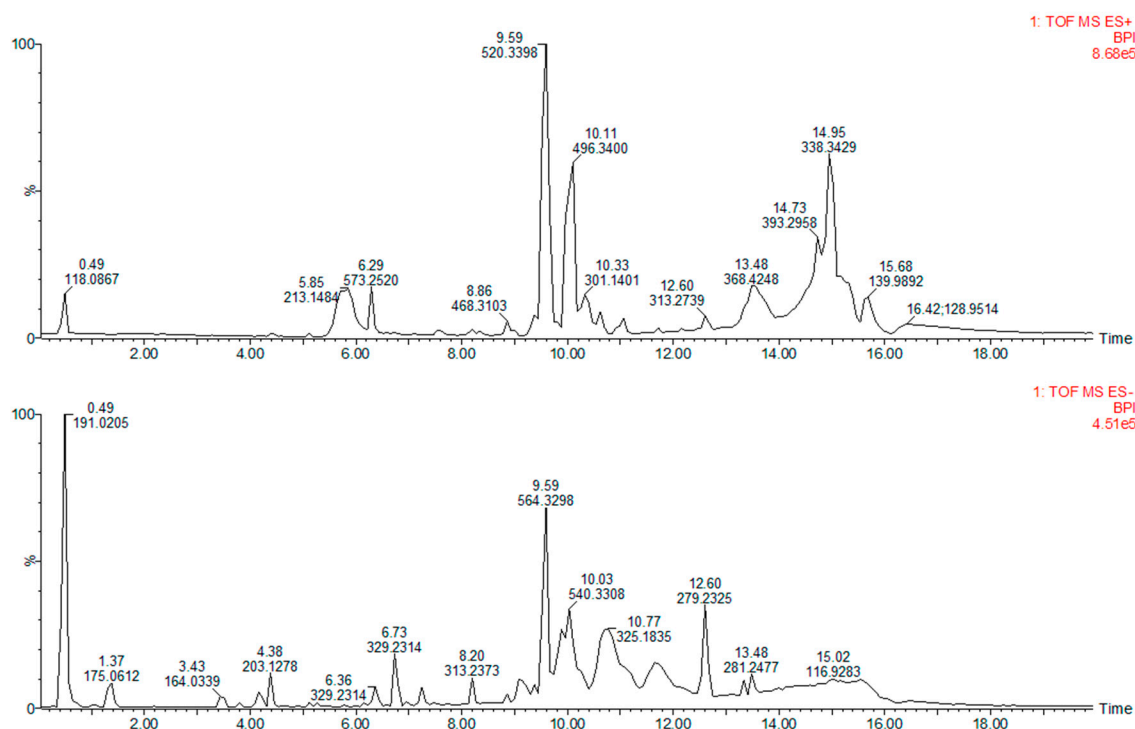

Figure S1. Ultra-Performance Liquid Chromatography-Mass Spectrometry (UPLC-MS) of crude extract from the fungus *Buergenerula spartinae* after solid-state fermentation.

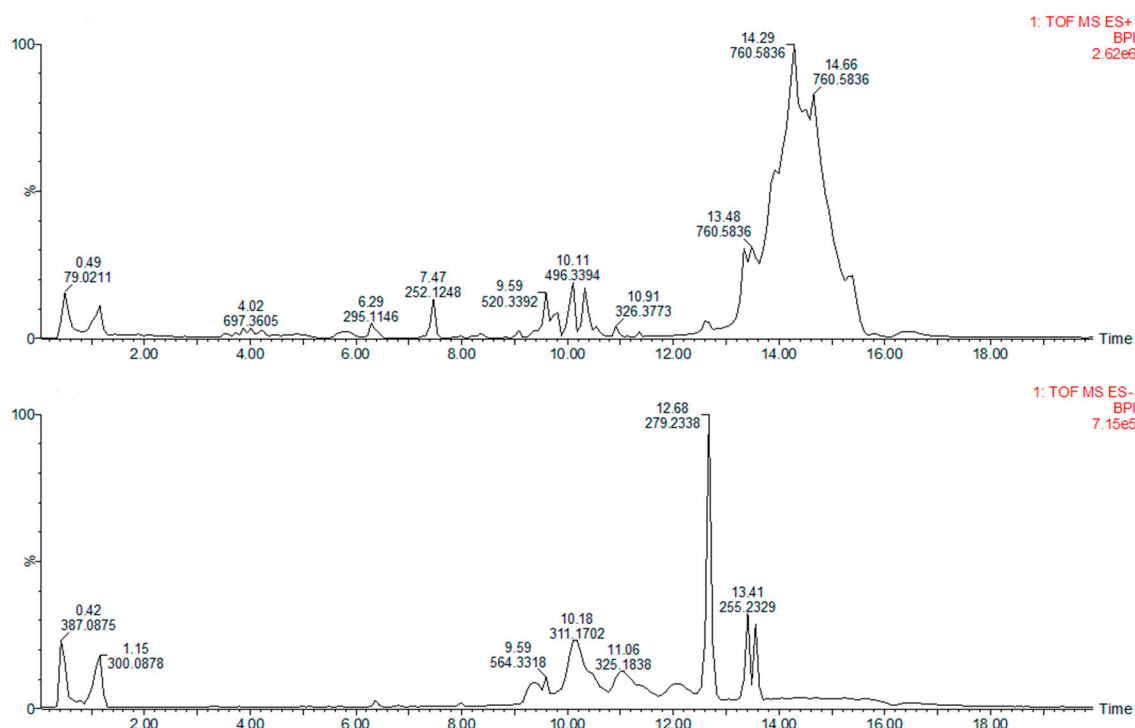

Figure S2. Ultra-Performance Liquid Chromatography-Mass Spectrometry (UPLC-MS) of crude extract from the fungus *Neofusicoccum parvum* after solid-state fermentation.
